# Supplementary material
Source: publisher figshare collection journal article supplement (https://geolsoc.figshare.com/ndownloader/files/28913014)
Supplement: Supplementary file 1 [file 28913014]

## Sheet: Data - Taxa
		Locality																															Age					Body						Type
Genus	Morphogroup	White Sea, Russia	Asha Group, South Urals	Chernokamen Formation, Central Urals	Yudoma Group, Siberia	Khatyspyt Formation, Olenek Uplift, Siberia	Ediacara Member, South Australia	Wonoka Formation, South Australia	Johnny Cake Shale, Kimberley, Western Australia	Arumbera Sandstone, Northern Territory	Moldova and Ukraine	Blueflower Formation, NW Canada	Nadaleen Formation, NW Canada	Miette Group, British Columbia	Conception and St. John’s Groups, Newfoundland	Johnnie Formation, Wood Canyon Formation, Stirling Quartzite and Deep Spring Formation, California and Nevada, West USA	The Kushk Series, Iran	Lantian Formation, South China	Miaohe Member, Yangtze Gorges, South China	Dengying Formation, Yangtze Gorges, South China	Shaanxi Province, South China	Nama Group, Namibia	Vindhyan and Marwar Supergroups, and Krol and Tal Groups, Uttar Pradesh Region	Bhima Group, Karnataka	Corumbá Group, SW Brazil/Paraguay	Itajaí Basin, Brazil	Ibor Group, Spain	Maplewell Group, Charnwood, UK	Albemarle Group, North Carolina	Zuun-Arts Formation, Mongolia	Ara Group, Oman	Stáhpogieddi Formation, Finnmark	-581	580-571	570-561	560-551	550-539	SiO2 Biomineraliser	CaCO3 Biomineraliser	Organic template	Agglutinated	Soft body	Soft body (Algal)	Algal	Bilateral	Radial	Frondomorph	Erniettomorph	Protist
Albumares	Triradialomorpha	Y					Y																													Y						Y				Y
Andiva	Dickinsoniomorpha	Y					Y																													Y						Y			Y
Anfesta	Triradialomorpha	Y															Y																			Y	Y					Y				Y
Anhuiphyton	Algal																	Y															Y										Y	Y
Annulatubus	Tubular					Y						Y																									Y					Y
Anulitibus	Tubular																															Y		Y				Y
Arborea	Arboreomorpha	Y					Y				Y				Y					Y				Y				Y							Y	Y	Y					Y					Y
Archaeaspinus	Bilateralomorpha	Y					Y																													Y						Y			Y
Archaeichnium	Tubular	Y																				Y							Y							Y	Y				Y
Archyfasma	Algal	Y																																		Y							Y	Y
Arkarua	Pentaradialomorpha						Y																													Y						Y				Y
Armillifera	Bilateralomorpha	Y																																		Y						Y			Y
Attenborites	Miscellaneous						Y																													Y						Y
Aulozoon	Tubular						Y																													Y						Y
Ausia	Miscellaneous	Y																				Y														Y	Y					Y
Avalofractus	Rangeomorpha														Y																				Y							Y					Y
Baculiphyca	Algal																		Y																	Y							Y	Y
Beltanelliformis	Cyanobacteria	Y	Y		Y						Y	Y							Y			Y	Y				Y					Y				Y	Y					Y
Beothukis	Rangeomorpha						Y						Y		Y																			Y	Y	Y						Y					Y
Bjarmia	Cnidarian	Y																																		Y						Y
Bomakellia	Rangeomorpha	Y																																		Y						Y					Y
Brachina	Miscellaneous						Y																													Y						Y
Bradgatia	Rangeomorpha						Y							Y	Y													Y						Y	Y	Y						Y					Y
Broccoliforma	Rangeomorpha														Y																				Y							Y					Y
Burykhia	Miscellaneous	Y																																		Y						Y
Calyptrina	Tubular	Y																	Y																	Y						Y
Cambrotubulus	Tubular					Y																															Y		Y
Cephalonega	Bilateralomorpha	Y																																		Y						Y			Y
Charnia	Rangeomorpha	Y				Y	Y				Y		Y		Y					Y								Y						Y	Y	Y	Y					Y					Y
Charniodiscus	Arboreomorpha	Y					Y								Y													Y						Y	Y	Y						Y					Y
Chinggiskhaania	Algal																													Y							Y						Y	Y
Chondroplon	Miscellaneous	Y					Y																													Y						Y
Cloudina	Tubular				Y	Y								Y		Y	Y			Y	Y	Y			Y		Y				Y						Y		Y
Coniculus	Tubular																															Y		Y				Y
Conomedusites	Tetraradialomorpha	Y					Y				Y												Y													Y	Y					Y				Y
Conotubus	Tubular																				Y																Y			Y
Convolutubus	Tubular																Y																				Y			Y
Coronacollina	Sponges						Y																													Y				Y
Corumbella	Tubular															Y	Y								Y												Y			Y
Costatubus	Tubular															Y																					Y			Y
Cucullus	Miscellaneous																		Y																	Y						Y
Culmofrons	Rangeomorpha														Y																				Y							Y					Y
Curviacus	Protist								Y											Y													Y				Y					Y							Y
Cyanorus	Bilateralomorpha	Y																																		Y						Y			Y
Dickinsonia	Dickinsoniomorpha	Y		Y			Y				Y									Y																Y	Y					Y			Y
Doushantuophyton	Algal																		Y				Y													Y	Y						Y	Y
Elainabella	Algal				Y											Y																					Y						Y	Y
Enteromorphites	Algal																		Y																	Y							Y	Y
Eoandromeda	Complex discoidal						Y												Y																	Y						Y				Y
Eoholynia	Algal	Y																							Y											Y	Y						Y	Y
Ernietta	Erniettomorpha																					Y							Y								Y					Y						Y
Fedomia	Sponges	Y																																		Y						Y
Fistula	Tubular																															Y		Y				Y
Flabellophyton	Algal						Y											Y	Y														Y			Y							Y	Y
Flavostratum	Miscellaneous	Y																																		Y						Y
Fractofusus	Rangeomorpha												Y		Y																			Y	Y							Y					Y
Frondophyllas	Rangeomorpha														Y																				Y							Y					Y
Funisia	Tubular						Y																													Y						Y
Gaojiashania	Tubular															Y					Y								Y								Y			Y
Gehlingia	Arboreomorpha						Y																													Y						Y					Y
Gesinella	Algal																		Y																	Y							Y	Y
Gibbavasis	Miscellaneous						Y				Y						Y																			Y	Y					Y
Hadrynichorde	Miscellaneous														Y													Y							Y	Y						Y
Hadryniscala	Miscellaneous														Y																				Y							Y
Hallidaya	Complex discoidal	Y								Y																										Y						Y				Y
Haootia	Cnidarian														Y																				Y							Y
Hapsidophyllas	Rangeomorpha														Y																				Y							Y					Y
Huangshanophyton	Algal																	Y															Y										Y	Y
Hylaecullulus	Rangeomorpha																											Y							Y	Y						Y					Y
Ikaria	Bilateralomorpha						Y																													Y						Y			Y
Ivovicia	Dickinsoniomorpha	Y																																		Y						Y			Y
Jiuqunaoella	Algal																		Y																	Y							Y	Y
Keretsa	Bilateralomorpha	Y																																		Y						Y			Y
Kharakhtia	Bilateralomorpha	Y																																		Y						Y			Y
Khatyspytia	Arboreomorpha					Y																															Y					Y					Y
Kimberella	Kimberellamorpha	Y					Y				Y						Y						Y													Y	Y					Y			Y
Konglingiphyton	Algal																		Y																	Y							Y	Y
Kuckaraukia	Complex discoidal		Y														Y																			Y	Y					Y				Y
Lantianella	Miscellaneous																	Y															Y									Y
Liulingjitaenia	Algal			Y			Y												Y																	Y							Y	Y
Lomosovis	Miscellaneous						Y				Y																									Y						Y
Longifuniculum	Algal						Y												Y																	Y							Y	Y
Lossina	Bilateralomorpha	Y																																		Y						Y			Y
Margaritiflabellum	Miscellaneous	Y																																		Y						Y
Marywadea	Bilateralomorpha						Y																													Y						Y			Y
Maxiphyton	Algal																		Y																	Y							Y	Y
Mezenia	Algal	Y		Y		Y																														Y	Y						Y	Y
Mialsemia	Arboreomorpha?	Y				Y					Y																									Y	Y					Y					Y
Miaohephyton	Algal																		Y																	Y							Y	Y
Miettia	Rangeomorpha													Y																						Y						Y					Y
Multiconotubus	Tubular																				Y																Y		Y
Namacalathus	Bilateralomorpha				Y									Y								Y			Y						Y						Y		Y						Y
Namalia	Miscellaneous												Y									Y												Y			Y					Y
Nasepia	Erniettomorpha																					Y															Y					Y						Y
Nenoxites	Tubular				Y	Y					Y								Y				Y													Y	Y					Y
Nilpenia	Miscellaneous						Y				Y																									Y						Y
Obamus	Miscellaneous						Y																													Y						Y				Y
Orbisiana	Protist	Y	Y												Y			Y	Y														Y			Y	Y				Y								Y
Ovatoscutum	Miscellaneous	Y				Y	Y				Y																									Y	Y					Y
Palaeopascichnus	Protist	Y	Y	Y	Y	Y		Y			Y				Y			Y	Y			Y				Y		Y				Y	Y	Y	Y	Y	Y				Y								Y
Palaeophragmodictya	Sponges						Y																													Y						Y
Palaeoplatoda	Erniettomorpha	Y																																		Y						Y						Y
Pambikalbae	Arboreomorpha						Y																													Y						Y					Y
Paracharnia	Rangeomorpha																			Y																	Y					Y					Y
Paraconularia	Cnidarian																								Y												Y			Y
Paravendia	Bilateralomorpha	Y																																		Y						Y			Y
Parvancorina	Bilateralomorpha	Y					Y																													Y						Y			Y
Parviscopa	Frondomorph														Y																				Y							Y					Y
Pectinifrons	Rangeomorpha														Y																				Y							Y					Y
Persimedusites	Complex discoidal																Y																				Y					Y				Y
Phyllozoon	Erniettomorpha						Y																													Y						Y						Y
Piyuania	Miscellaneous																	Y															Y									Y
Platypholinia	Miscellaneous	Y																																		Y						Y
Plexus	Tubular						Y																													Y						Y
Plumeropriscum	Rangeomorpha														Y																				Y							Y					Y
Podolimirus	Dickinsoniomorpha										Y																									Y						Y			Y
Pomoria	Triradialomorpha	Y																																		Y						Y				Y
Praecambridium	Bilateralomorpha						Y																													Y						Y			Y
Primocandelabrum	Rangeomorpha												Y		Y													Y						Y	Y	Y						Y					Y
Protechiurus	Miscellaneous																					Y															Y					Y
Protoconites	Tubular																		Y																	Y						Y
Pteridinium	Erniettomorpha	Y					Y					Y				Y				Y		Y							Y							Y	Y					Y						Y
Qianchuania	Miscellaneous																	Y															Y									Y
Ramellina	Miscellaneous	Y																																		Y						Y
Rangea	Rangeomorpha	Y					Y													Y		Y														Y	Y					Y					Y
Rugoconites	Sponges	Y					Y																													Y						Y
Saarina	Tubular															Y											Y										Y			Y
Sabellidites	Tubular	Y																									Y									Y	Y					Y
Sekwitubulus	Tubular											Y																									Y					Y
Shaanxilithes	Tubular																				Y	Y					Y										Y			Y
Sinocylindra	Algal																		Y																	Y							Y	Y
Sinospongia	Tubular																		Y																	Y						Y
Sinotubulites	Tubular																				Y						Y										Y		Y
Skinnera	Triradialomorpha									Y		Y																								Y	Y					Y				Y
Solza	Kimberellamorpha	Y																																		Y						Y			Y
Somatohelix	Tubular						Y																													Y						Y
Spriggina	Bilateralomorpha						Y																													Y						Y			Y
Staurinidia	Cnidarian	Y																																		Y						Y
Suvorovella	Complex discoidal				Y																	Y															Y		Y							Y
Swartpuntia	Erniettomorpha																					Y							Y								Y					Y						Y
Tamga	Miscellaneous	Y																																		Y						Y
Temnoxa	Bilateralomorpha	Y																																		Y						Y			Y
Thectardis	Sponges														Y																			Y	Y							Y
Trepassia	Rangeomorpha														Y																			Y	Y							Y					Y
Tribrachidium	Triradialomorpha	Y					Y				Y																									Y						Y				Y
Triforillonia	Triradialomorpha														Y																				Y							Y				Y
Vaizitsinia	Arboreomorpha	Y																																		Y						Y					Y
Valdainia	Erniettomorpha										Y																									Y						Y						Y
Vaveliksia	Miscellaneous	Y					Y				Y																									Y						Y
Velancorina	Miscellaneous																					Y															Y					Y
Vendia	Bilateralomorpha	Y																																		Y						Y			Y
Vendoconularia	Cnidarian	Y																				Y														Y	Y					Y
Vendomia	Dickinsoniomorpha	Y																																		Y						Y			Y
Vendotaenids	Algal	Y				Y	Y					Y		Y	Y					Y		Y			Y		Y									Y	Y						Y	Y
Ventogyrus	Miscellaneous	Y																																		Y						Y
Vinlandia	Rangeomorpha														Y																			Y	Y							Y					Y
Windermeria	Dickinsoniomorpha											Y																								Y						Y			Y
Wutubus	Tubular															Y				Y																	Y					Y
Xiuningella	Algal																	Y															Y										Y	Y
Yangtziramulus	Miscellaneous																			Y																	Y					Y
Yarnemia	Miscellaneous	Y																																		Y						Y
Yelovichnus	Protist	Y													Y																	Y			Y	Y	Y					Y							Y
Yilingia	Bilateralomorpha																			Y																	Y					Y			Y
Yorgia	Dickinsoniomorpha	Y					Y																													Y						Y			Y
Zolotytsia	Miscellaneous	Y									Y																									Y	Y					Y
Zuunartsphyton	Algal																													Y							Y						Y	Y
Zuunia	Tubular																													Y							Y			Y
	Bilaterian trace fossils	Y	Y				Y				Y	Y		Y		Y			Y		Y	Y			Y											Y	Y								Y
[truncated: 25 more columns]

## Sheet: Data - Localities
Locality	Age					MER21 Palaeolatitude											SCO01 Palaeolatitude											Lithology
	-581	580-571	570-561	560-551	550-539	80-90	70-80	60-70	50-60	40-50	30-40	20-30	10-20	0-10	High 45-90	Low 0-45	80-90	70-80	60-70	50-60	40-50	30-40	20-30	10-20	0-10	High 45-90	Low 0-45	Deep	Shallow	Lacustrine	Carbonate	Siliciclastic	Age reference	Lithology reference	Notes
White Sea, Russia				Y								Y				Y				Y						Y			Y			Y	Martin et al., 2000	Grazhdankin, 2004	The Lyamtsa to Erga Formations have been interpreted by Grazhdankin 2004 as shoreface to distributary mouth bar and deltaic deposits, with U-Pb dated tuffs in the Zimnegory Formation (555.3±0.3Ma, Martin et al 2000), and base of the Verkhovka Fm (558±1 Ma) bracketing a substantial portion of the fossil-bearing stratigraphy, and implying the the assemblage likely lies within the 560-551Ma age brac…
Asha Group, South Urals				Y									Y			Y		Y								Y			Y			Y	Grazhdankin et al., 2011; Levashova et al., 2013; Razumovskiy et al., 2020	Grazhdankin et al., 2011; Kolesnikov and Bobkov, 2019	The Asha Group in the South Urals includes a recent U-Pb date of 573.0±2.3 Ma in the Basa Formation (Razumovskiy et al., 2020), and 547.6 ± 3.8 Ma from what is thought to be the Zigan Fm (Levashova et al., 2013), although other authors suggest this tuff could be derived from the lower Basa Fm (Kolesnikov & Bobkov, 2019).Although those latter authors have proposed a Cambrian age for the Asha Group…
Chernokamen Formation, Central Urals				Y									Y			Y			Y							Y			Y			Y	Ronkin et al., 2006; Maslov et al., 2013; Grazhdankin et al., 2011	Grazhdankin et al., 2009	Dates from the Sylvitsa Group include U-Pb dates of 567.2 ± 3.9 Ma from the Peravalok Fm (beneath the most fossil-bearing units, but containing some algal taxa and Palaeopascichnus), and 557 ± 13 Ma in the Chernokamen Fm (Ronkin et al., 2006, summarised in Maslov et al 2013). Based on the presence of Dickinsonia and Yorgia and their well-constrained ages elsewhere on the East European Platform, t…
Yudoma Group, Siberia					Y								Y			Y							Y				Y		Y		Y	Y	Semikhatov et al., 2003; but see Wood et al., 2017	Wood et al., 2017	For Yudoma, the only available date is a 553 ± 23 Myr Pb-Pb date from the upper Aim Formation (Semikhatov et al., 2003). The taxa present in the Aim and Ust-Yudoma formations predominantly occur in younger late-Ediacaran rocks elsewhere, and thus we suggest that they fall within our youngest time-bin. Almost all macrofossils lie within carbonate lithologies, but some tubular taxa can be found wit…
Khatyspyt Formation, Olenek Uplift, Siberia					Y									Y		Y						Y					Y	Y			Y		Bowring et al., 1993; Mitchell et al., 2020	Grazhdankin et al., 2008	Mitchell et al., 2020, include the line: "A positive δ13Ccarb excursion in the Khatyspyt Formation has been correlated with an excursion of similar magnitude in the <550 Ma Gaojiashan Member of the Dengying Formation (73). Strontium isotope ratios (87Sr/86Sr) in the Khatyspyt Formation are consistently ca. 0.7080 (73,74), a value approaching some of the ratios seen in the Gaojiashan Member (75), …
Ediacara Member, South Australia				Y										Y		Y								Y			Y		Y			Y	-	Gehling, 2000; McMahon et al., 2020	This site is undated, and so we correlate it to the White Sea (Russia) following multiple previous authors who note the similar biotas of these two localities.
Wonoka Formation, South Australia			Y											Y		Y								Y			Y		Y		Y		Haines, 2000	Haines, 2000; Husson et al., 2015	The Wonoka Fm. contains a negative carbon isotope excursion that has been widely correlated to the Shuram excursion. Recent dating of sites in NW Canada and Oman suggest that this excursion lasted ~574-567 Ma (as dated by Rooney et al., 2020). Given that the fossils occur towards the top of the Wonoka Fm., 570-561 Ma for the age of the fossils in this unit is plausible, if not necessarily 100% ac…
Johnny Cake Shale, Kimberley, Western Australia	Y												Y			Y							Y				Y			Y		Y	Lan and Chen, 2012	Lan and Chen, 2012	No chronostratigraphic control currently exists for this locality; we follow discussions of age in Lan and Chen, 2012, who suggest that the fossils here are of >581Ma. Those authors also claim that the interval in which the fossils are found is lacustrine (following Dunster et al., 2000). We follow this interpretation here. The specimens described from this locality, discussed as Palaeopascichnus…
Arumbera Sandstone, Northern Territory				Y									Y			Y							Y				Y		Y			Y	Grey and Calver, 2007	Mapstone and McIlroy, 2006	This section is undated. We follow the correlation of the Arumbera Sandstone with the Rawnsley Quartzite of the Adelaide Rift Complex proposed by Grey and Calver, 2007
Moldova and Ukraine				Y								Y				Y			Y							Y			Y			Y	Soldatenko et al., 2019; Francovschi et al., 2021	Ivantsov et al., 2015	The Mohyliv Formation of the Moguiliv-Podilska Group is dated to 556.78 ± 0.18 Ma, and the overlying Yarishyv Fm to 555.4 ± 2.9Ma by U-Pb dating of zircons in bentonite horizons (Soldatenko et al., 2019; note however that Francovschi et al., 2021 consider the older date to also lie within the Yarishyv Fm). Fossils occur between, above and below those dated horizons in Ukraine. The Kalyus Beds of …
Blueflower Formation, NW Canada				M	M								Y			Y							Y				Y	Y	Y		Y	Y	Macdonald et al., 2013; Rooney et al., 2020	MacNaughton 2020	Macdonald et al., 2013 suggest that the Blueflower Formation fossils are 555 Ma or younger. Rooney et al 2020 date the lower Blueflower Fm to 567 Ma (plus/minus 3 Myr), but do not provide a minimum age for the top of the unit. On the basis of its position within the stratigraphy, we place Windermeria in the 560-551 Ma time bin, and all other taxa in the 550-539 Ma time bin.
Nadaleen Formation, NW Canada		Y												Y		Y						Y					Y	Y			Y	Y	Narbonne et al., 2014; Rooney et al., 2020	Moynihan et al., 2019; MacNaughton 2020	Rooney et al., 2020 obtain a date of 574 ± 4.7 Ma from above the fossils of the Nadaleen Fm (previously referred to as the June Beds - see Moynihan et al., 2019), suggesting that the macrofossils there have a minimum age of ~574 Ma.
Miette Group, British Columbia				M	M									Y		Y							Y				Y	Y	Y		Y	Y	-	Hofmann and Mountjoy, 2001, 2010	The Miette Group has not been dated. Carbonates of the Byng Fm contain Cloudina, strongly suggesting that they are of similar latest Ediacaran age (i.e. <550Ma) to other global occurrences of that genus. The siliciclastic beds beneath this are of unknown age, and could therefore extend down into the 560-551 Ma time bin. We place Bradgatia, Miettia and Vendotaenids in this older time-bin on the ba…
Conception and St. John’s Groups, Newfoundland		M	Y	M	M			Y							Y		Y									Y		Y				Y	Matthews et al., 2020	Wood et al., 2003	Thectardis, Fractofusus, Primocandelabrum, Palaeopascichnus, Bradgatia, Beothukis, Charnia, Charniodiscus, Vinlandia and Trepassia occur in the 580-571 Ma time bin (on the basis of age models presented in Matthews et al., 2020m who present six U-Pb dates through the Drook to Fermeuse formations). Those taxa, and all the others reported from both the Avalon and Bonavista Peninsulas, also occur in …
Johnnie Formation, Wood Canyon Formation, Stirling Quartzite and Deep Spring Formation, California and Nevada, West USA					Y								Y			Y								Y			Y		Y		Y	Y	-	Selly et al., 2020	These sections in Nevada and California are not directly dated, but are deemed to be latest Ediacaran on the basis of the proximity of their fossils to ichnological and chemostratigraphic markers of the basal Cambrian (T. pedum and the BACE respectively).
The Kushk Series, Iran					Y						Y					Y									Y		Y		Y			Y	Vickers-Rich et al., 2018; Vaziri et al., 2021	Vaziri et al., 2021	Vaziri et al., 2021 state that the fossils are found within a single siliciclastic facies within a carbonate succession. In the absence of shallow water sedimentological indicators for that specific facies, those authors interpret it as a deep sub-tidal depositional environment. Since much of the rest of the unit comprises shallow marine carbonates, we consider it likely that the fossiliferous de…
Lantian Formation, South China	Y													Y		Y						Y					Y		Y			Y	Yuan et al., 2011	Yuan et al., 2011	This unit has not been directly dated. Litho- and chemostratigraphic correlation with the Doushantuo Fm implies a likely >580 Ma age.
Miaohe Member, Yangtze Gorges, South China				Y										Y		Y						Y					Y		Y			Y	Condon et al., 2005; An et al., 2015	An et al., 2015	A date of 551.1 ± 0.7 Ma from the top of the Miaohe Member in the Jiuqunao section of South China indicates that its fossils are >551 Ma in age.
Dengying Formation, Yangtze Gorges, South China					Y								Y			Y						Y					Y		Y		Y	Y	Condon et al., 2005; Huang et al., 2020; Xiao et al., 2021	Xiao et al., 2021	Uncertainties regarding the precise correlation of the Miaohe Member and the Dengying Formation (see An et al., 2015) exist, but the most recent review of the Shibantan Member interprets the 551 Ma date above (Condon et al., 2005) to be a maximum age for the Shibantan Member fossils. A tuffaceous layer dated to 543.4 ± 3.5 Ma in the overlying Baimatuo Member (Huang et al., 2020) provides a minimu…
Shaanxi Province, South China					Y								Y			Y						Y					Y		Y		Y	Y	Cai et al., 2010	Cai et al., 2017	This section is not directly dated. Correlation with other sections in South China led Cai et al., 2010 to propose a 551-541 Ma age for the Dengying Fm at this locality. Tubular taxa are largely, but not exclusively, found in carbonate beds.
Nama Group, Namibia					Y				Y						Y						Y						Y		Y		Y	Y	Grotzinger et al., 1995; Linnemann et al., 2019	Saylor et al., 2005	Soft-bodied taxa and trace fossils are found within siliciclastic horizons, whereas biomineralizers are found in carbonates. Numerous dates for the fossil-bearing units in the Nama Group have been presented, ranging from ~545 Ma to 538.8Ma (summarised in Linnemann et al., 2019).
Vindhyan and Marwar Supergroups, and Krol and Tal Groups, Uttar Pradesh Region					Y							Y				Y									Y		Y		Y		Y	Y	Tarhan et al., 2014	Tarhan et al., 2014	This section is undated, and the veracity of several claimed genera from this locality has been questioned. Tarhan et al., 2014 propose that the sections containing Shaanxilithes are of latest Ediacaran age. Those fossils occur on siltstone and dolomite beds, and therefore we categorise the lithology here as mixed carbonate and siliciclastic.
Bhima Group, Karnataka				Y							Y					Y								Y			Y		Y			Y	-	Shukla and Sharma, 2020	The Hotpet Fm contains a solitary frondose specimen (Shukla and Sharma, 2020), and is extremely poorly age constrained. We have opted to assign it to our 570-561 Ma time-bin, noting that frondose taxa elsewhere in the world are common in this time interval, but in reality it could lie anywhere within the late Ediacaran.
Corumbá Group, SW Brazil/Paraguay					Y			Y							Y				Y							Y			Y		Y	Y	Parry et al., 2017	Parry et al., 2017; Warren et al., 2019; Amorim et al., 2020	U-Pb dates from zircons in tuffs in the Bocaina and Guaicurus formations bracket the fossils and traces in the Tamengo Formation to between 555.18 ± 0.3 Ma and 541.85 ± 0.75 Ma (Parry et al., 2017). The carbonates and marls/siltstones of the Tamengo Formation are interpreted as shallow marine deposits. The Itapucumi Group in neighbouring Paraguay is also considered to be latest Ediacaran in age.
Itajaí Basin, Brazil			Y							Y						Y					Y					Y			Y			Y	Becker-Kerber et al., 2020	Becker-Kerber et al., 2020	The sedimentary succession within the Itajai Basin includes a U-Pb date of 563 ± 3.3 Ma (Becker-Kerber et al., 2020). This is close to, but not precisely correlated with, the level at which Palaeopascichnus fossils are found in other sections within the basin. We infer the age of these Palaeopascichnus specimens to most likely fall within the 570-561 Ma time bin.
Ibor Group, Spain					Y			Y							Y						Y						Y		Y		Y	Y	Alvaro et al., 2020	Alvaro et al., 2020	Although the section is undated, both chemo- and biostratigraphy (body and trace fossils) indicate a latest Ediacaran age for the Ibor Group. Shelly fossils are found within carbonates, vendotaenids are present in siliciclastics.
Maplewell Group, Charnwood, UK			Y	Y				Y							Y			Y								Y		Y				Y	Noble et al., 2015	Carney, 1999	Multiple U-Pb radiometric dates of zircons from tuffs in the Maplewell Group indicate that the majority of the fossils in the Charnwood sections, within the Bradgate Formation, lie between 561.85 ±0.34 Ma and 556.6 ±6.4 Ma (Noble et al., 2015). We have therefore placed them within our 561-550 Ma age bracket.
Albemarle Group, North Carolina					Y			Y							Y			Y								Y			Y			Y	Hibbard et al., 2006	Weaver et al., 2006	The Flat Swamp Member of the Cid Formation, lying above the fossil-bearing portions of the Cid Formation, has yielded a U-Pb date of 547 ± 2 Ma (Hibbard et al., 2006), providing a minimum age for those specimens.
Zuun-Arts Formation, Mongolia					Y									Y		Y									Y		Y		Y			Y	Smith et al., 2016; Yang et al., 2020	Smith et al., 2016; Yang et al., 2020	This section is currently undated, but the Zuun-Arts Fm (with fossils found close to its base) is considered by Smith et al., 2016 and Yang et al., 2020 to be latest Ediacaran in age.
Ara Group, Oman					Y						Y					Y								Y			Y		Y		Y		Amthor et al., 2003; Bowring et al., 2007	Conway Morris et al., 1990	A date from the Ara Group, just below the BACE carbon isotope excursion but above Cloudina specimens, provides a minimum age constraint of 541.00 ± 0.81 Ma for the fossils in this unit.
Stáhpogieddi Formation, Finnmark		M		M	M							Y				Y				Y						Y			Y			Y	Jensen et al., 2018	McIlroy and Brasier, 2017; Jensen et al., 2018	Jensen et al., 2018 discuss the age of the fossil bearing strata in this section at length, and propose a young age, but the section could lie within the 560-551 Ma time bin (or even older). Since this is so uncertain, we have opted for both the youngest and the middle option (560-539 Ma), but note that these fossils could be older. Yelovichnus is reported from only the very end of the section, s…
	M - Not all taxa occur in this time-bin, specified in the Notes column.

## Sheet: Plots - Temporal Data
Overall diversity through time
Data for Supp. Fig. 3
Age	Localities	Taxa
585	2	10
575	3	14
565	4	25
555	13	110
545	17	60
Total	39	219
Diversity through time in 45° palaeolatitudinal bands
Data for Fig. 2 inset and Supp. Fig. 13 inset
	MER21 Localities		MER21 Taxa		SCO01 Localities		SCO01 Taxa
Age	Low	High	Low	High	Low	High	Low	High
585	2	0	10	0	2	0	10	0
575	2	1	8	10	1	2	5	13
565	2	2	3	25	1	3	2	25
555	11	2	107	8	6	7	65	74
545	12	5	47	26	13	4	55	14
Total	29	10	175	69	23	16	137	126
Normalised taxon diversity for locality density through time in 45° palaeolatitudinal bands
Data for Supp. Figs. 6 and 14
			MER21 Normalised Taxa				SCO01 Normalised Taxa
Age			Low	High			Low	High
585			-2.06897	0			-1.91304	0
575			-4.06897	3.1			-0.956522	-2.75
565			-9.06897	11.2			-3.95652	1.375
555			40.6207	-5.8			29.2609	18.875
545			-25.4138	-8.5			-22.4348	-17.5
Type and Morphogroup data through time
All Types, for Supp. Fig. 4
Age	Algal	Bilateral	Erniettomorph	Frondomorph	Protist	Radial	Tubular	Miscellaneous
585	4	0	0	0	3	0	0	3
575	0	0	0	8	1	0	3	2
565	0	0	0	18	2	1	0	4
555	16	24	4	14	3	11	10	28
545	7	4	4	6	4	6	18	11
All Morphogroups, for Supp. Fig. 5
Age	Algal	Arboreomorpha	Bilateralomorpha	Cnidarian	Dickinsoniomorpha	Complex discoidal	Erniettomorpha	Kimberellamorpha	Pentaradialomorpha	Protist	Rangeomorpha	Sponges	Tetraradialomorpha	Triradialomorpha	Tubular	Tunicate	Miscellaneous
585	4	0	0	0	0	0	0	0	0	3	0	0	0	0	0	0	3
575	0	1	0	0	0	0	0	0	0	1	7	1	0	0	3	0	1
565	0	2	0	1	0	0	0	0	0	2	15	1	0	1	0	0	3
555	16	6	15	3	7	3	4	2	1	3	8	4	1	5	10	0	22
545	7	3	2	2	1	3	4	1	0	4	3	0	1	2	18	0	9
MER21 Low Types, for Fig. 3a
Age	Algal	Bilateral	Erniettomorph	Frondomorph	Protist	Radial	Tubular	Miscellaneous
585	4	0	0	0	3	0	0	3
575	0	0	0	6	1	0	3	1
565	0	0	0	7	2	0	0	0
555	16	24	4	13	3	11	10	27
545	7	4	1	6	4	6	18	8
MER21 High Types, for Fig. 3b
Age	Algal	Bilateral	Erniettomorph	Frondomorph	Protist	Radial	Tubular	Miscellaneous
585	0	0	0	0	2	0	0	0
575	0	0	0	8	1	0	0	2
565	0	0	0	18	2	1	0	4
555	2	0	1	8	3	0	2	4
545	2	1	4	3	3	1	8	7
MER21 Low Morphogroups, for Supp. Fig. 8a
Age	Algal	Arboreomorpha	Bilateralomorpha	Cnidarian	Dickinsoniomorpha	Complex discoidal	Erniettomorpha	Kimberellamorpha	Pentaradialomorpha	Protist	Rangeomorpha	Sponges	Tetraradialomorpha	Triradialomorpha	Tubular	Tunicate	Miscellaneous
585	4	0	0	0	0	0	0	0	0	3	0	0	0	0	0	0	3
575	0	1	0	0	0	0	0	0	0	1	5	0	0	0	3	0	1
565	0	2	0	0	0	0	0	0	0	2	5	0	0	0	0	0	0
555	16	6	15	3	7	3	4	2	1	3	7	4	1	5	10	0	21
545	7	3	2	1	1	3	1	1	0	4	3	0	1	2	18	0	7
MER21 High Morphogroups, for Supp. Fig. 8b
Age	Algal	Arboreomorpha	Bilateralomorpha	Cnidarian	Dickinsoniomorpha	Complex discoidal	Erniettomorpha	Kimberellamorpha	Pentaradialomorpha	Protist	Rangeomorpha	Sponges	Tetraradialomorpha	Triradialomorpha	Tubular	Tunicate	Miscellaneous
585	0	0	0	0	0	0	0	0	0	2	0	0	0	0	0	0	0
575	0	1	0	0	0	0	0	0	0	1	7	1	0	0	0	0	1
565	0	2	0	1	0	0	0	0	0	2	15	1	0	1	0	0	3
555	2	2	0	1	0	0	1	0	0	3	6	0	0	0	2	0	3
545	2	1	1	2	0	1	4	0	0	3	2	0	0	0	8	0	4
SCO01 Low Types, for Supp. Fig. 15a
Age	Algal	Bilateral	Erniettomorph	Frondomorph	Protist	Radial	Tubular	Miscellaneous
585	4	0	0	0	3	0	0	3
575	0	0	0	6	1	0	0	1
565	0	0	0	7	1	0	0	0
555	14	11	2	11	2	10	10	15
545	6	4	4	6	3	6	18	9
SCO01 High Types, for Supp. Fig. 15b
Age	Algal	Bilateral	Erniettomorph	Frondomorph	Protist	Radial	Tubular	Miscellaneous
585	0	0	0	0	2	0	0	0
575	0	0	0	8	1	0	3	1
565	0	0	0	18	2	1	0	4
555	5	19	3	11	3	7	4	23
545	3	3	3	4	3	3	6	7
SCO01 Low Morphogroups, for Supp. Fig. 17a
Age	Algal	Arboreomorpha	Bilateralomorpha	Cnidarian	Dickinsoniomorpha	Complex discoidal	Erniettomorpha	Kimberellamorpha	Pentaradialomorpha	Protist	Rangeomorpha	Sponges	Tetraradialomorpha	Triradialomorpha	Tubular	Tunicate	Miscellaneous
585	4	0	0	0	0	0	0	0	0	3	0	0	0	0	0	0	3
575	0	1	0	0	0	0	0	0	0	1	5	0	0	0	0	0	1
565	0	2	0	0	0	0	0	0	0	1	5	0	0	0	0	0	0
555	14	4	6	1	4	3	2	1	1	2	6	3	1	4	10	0	12
545	6	3	2	1	1	3	4	1	0	3	3	0	1	2	18	0	8
SCO01 High Morphogroups, for Supp. Fig. 17b
Age	Algal	Arboreomorpha	Bilateralomorpha	Cnidarian	Dickinsoniomorpha	Complex discoidal	Erniettomorpha	Kimberellamorpha	Pentaradialomorpha	Protist	Rangeomorpha	Sponges	Tetraradialomorpha	Triradialomorpha	Tubular	Tunicate	Miscellaneous
585	0	0	0	0	0	0	0	0	0	2	0	0	0	0	0	0	0
575	0	1	0	0	0	0	0	0	0	1	7	1	0	0	3	0	0
565	0	2	0	1	0	0	0	0	0	2	15	1	0	1	0	0	3
555	5	4	11	3	6	2	3	2	0	3	7	2	1	4	4	0	18
545	3	1	1	2	1	1	3	1	0	3	2	0	1	1	6	0	4

## Sheet: Plots - Palaeolatitudinal Data
Diversity in 20° palaeolatitudinal bands
MER21 data for graphs in Figs. 4, 5 and Supp. Figs. 10-12
Latitude	Localities	Total Taxa	Bilateral	Non-bilateral	Biomineralisers	Organic Template	Soft Body	Biomineralising Tubes	Organic Template Tubes	Soft Tubes	Bilateralomorpha	Dickinsoniomorpha	Kimberellamorpha	Localities 560-551	Localities 550-539	Bilateral 560-551	Bilateral 550-539
10	17	102	13	89	6	8	66	4	7	11	8	4	1	7	8	11	4
30	7	78	20	58	2	2	63	1	2	3	12	6	2	4	4	19	3
50	2	18	1	17	3	1	11	1	1	0	1	0	0	0	1	0	1
70	5	42	1	41	3	5	29	2	4	1	1	0	0	2	4	0	1
90	0	0	0	0	0	0	0	0	0	0	0	0	0	0	0	0	0
Total	31	240	35	205	14	16	169	8	14	15	22	10	3	13	17	30	9
SCO01 data for graphs in Supp. Figs. 18, 19, 21 and 22
Latitude	Localities	Total Taxa	Bilateral	Non-bilateral	Biomineralisers	Organic Template	Soft Body	Biomineralising Tubes	Organic Template Tubes	Soft Tubes	Bilateralomorpha	Dickinsoniomorpha	Kimberellamorpha
10	8	64	11	53	2	7	46	1	6	6	7	3	1
30	11	63	4	59	6	3	34	4	3	7	2	2	0
50	5	77	19	58	4	2	61	2	2	2	12	5	2
70	6	38	4	34	2	3	26	1	2	1	1	2	1
90	1	26	0	26	0	0	23	0	0	0	0	0	0
Total	31	268	38	230	14	15	190	8	13	16	22	12	4
Normalised diversity for locality density
MER21 data for normalised graphs in Supp. Figs. 9-12
Latitude		Total Taxa	Bilateral	Non-bilateral	Biomineralisers	Organic Template	Soft Body	Biomineralising Tubes	Organic Template Tubes	Soft Tubes	Bilateralomorpha	Dickinsoniomorpha	Kimberellamorpha	Bilateral 560-551	Bilateral 550-539
10		-29.6129	-6.19355	-23.4194	-1.67742	-0.774194	-26.6774	-0.387097	-0.677419	2.77419	-4.06452	-1.48387	-0.645161	-5.15385	-0.235294
30		23.8065	12.0968	11.7097	-1.16129	-1.6129	24.8387	-0.806452	-1.16129	-0.387097	7.03226	3.74194	1.32258	9.76923	0.882353
50		2.51613	-1.25806	3.77419	2.09677	-0.0322581	0.0967742	0.483871	0.0967742	-0.967742	-0.419355	-0.645161	-0.193548	0	0.470588
70		3.29032	-4.64516	7.93548	0.741935	2.41935	1.74194	0.709677	1.74194	-1.41935	-2.54839	-1.6129	-0.483871	-4.61538	-1.11765
90		0	0	0	0	0	0	0	0	0	0	0	0	0	0
SCO01 data for normalised graphs in Supp. Figs. 19-22
Latitude		Total Taxa	Bilateral	Non-bilateral	Biomineralisers	Organic Template	Soft Body	Biomineralising Tubes	Organic Template Tubes	Soft Tubes	Bilateralomorpha	Dickinsoniomorpha	Kimberellamorpha
10		-5.16129	1.19355	-6.35484	-1.6129	3.12903	-3.03226	-1.06452	2.64516	1.87097	1.32258	-0.0967742	-0.0322581
30		-32.0968	-9.48387	-22.6129	1.03226	-2.32258	-33.4194	1.16129	-1.6129	1.32258	-5.80645	-2.25806	-1.41935
50		33.7742	12.871	20.9032	1.74194	-0.419355	30.3548	0.709677	-0.0967742	-0.580645	8.45161	3.06452	1.35484
70		-13.871	-3.35484	-10.5161	-0.709677	0.0967742	-10.7742	-0.548387	-0.516129	-2.09677	-3.25806	-0.322581	0.225806
90		17.3548	-1.22581	18.5806	-0.451613	-0.483871	16.871	-0.258065	-0.419355	-0.516129	-0.709677	-0.387097	-0.129032

## Sheet: R - All Data
Overall diversity through time
For Kruskal-Wallis test, referenced in the code as: Overall.csv
Age	Localities	Taxa
585	2	10
575	3	14
565	4	25
555	13	110
545	17	60
Diversity through time in 45° palaeolatitudinal bands
For Kruskal-Wallis tests, referenced in the code as: Temporal.csv
Age	Low_LocalitiesMER	High_LocalitiesMER	Low_TaxaMER	High_TaxaMER	Low_LocalitiesSCO	High_LocalitiesSCO	Low_TaxaSCO	High_TaxaSCO
585	2	0	10	0	2	0	10	0
575	2	1	8	10	1	2	5	13
565	2	2	3	25	1	3	2	25
555	11	2	107	8	6	7	65	74
545	12	5	47	26	13	4	55	14
Taxa and locality counts in 20° palaeolatitudinal bands
For MER21 Kruskal-Wallis test, referenced in the code as: OverallMER.csv
Latitude	Localities	Total_Taxa
10	17	102
30	7	78
50	2	18
70	5	42
90	0	0
For SCO01 Kruskal-Wallis tests, referenced in the code as: OverallSCO.csv
Latitude	Localities	Total_Taxa
10	8	64
30	11	63
50	5	77
70	6	38
90	1	26
Type and body composition counts in 45° palaeolatitudinal bands
For MER21 Chi-squared tests, referenced in the code as: ChiMER.csv
Latitude	Localities	Total_Taxa	Algal	Bilateral	Radial	Frondomorph	Erniettomorph	Protist	Tubular	Miscellaneous	Biomineraliser	Organic_template	Agglutinated	Soft_body	Soft_body_(Algal)	Biomineralising_Tubes	Organic_template_Tubes	Soft_Tubes	Biomineralising_Organic_template	Non_Algal	Non_Bilateral	Non_Frondomorph	Non_Tubular	Non_Miscellaneous	Non_Soft_body	Non_Bio_Org
Low	25	145	22	26	13	16	4	4	28	32	6	9	3	102	22	4	8	12	15	123	123	129	117	113	43	130
High	6	50	2	1	2	19	4	3	8	11	4	5	3	36	2	2	4	1	9	48	48	31	42	39	14	41
For SCO01 Chi-squared tests, referenced in the code as: ChiSCO.csv
Latitude	Localities	Total_Taxa	Algal	Bilateral	Radial	Frondomorph	Erniettomorph	Protist	Tubular	Miscellaneous	Biomineraliser	Organic_template	Agglutinated	Soft_body	Soft_body_(Algal)	Biomineralising_Tubes	Organic_template_Tubes	Soft_Tubes	Biomineralising_Organic_template	Non_Algal	Non_Bilateral	Non_Radial	Non_Frondomorph	Non_Tubular	Non_Miscellaneous	Non_Soft_body	Non_Bio_Org
Low	21	114	20	13	12	14	5	3	25	22	6	9	3	76	20	4	8	12	15	94	94	102	100	89	92	38	99
High	10	100	5	20	8	22	5	3	10	27	2	3	3	84	5	1	2	3	5	95	95	92	78	90	73	16	95

## Sheet: Maps - >571 Ma
	Morphogroups																Type
Locality	Algal	Arboreomorpha	Bilateralomorpha	Cnidarian	Dickinsoniomorpha	Complex discoidal	Erniettomorpha	Kimberellamorpha	Pentaradialomorpha	Protist	Rangeomorpha	Sponges	Tetraradialomorpha	Triradialomorpha	Tubular	Miscellaneous	Algal	Bilateral	Radial	Frondomorph	Erniettomorph	Protist	Tubular	Miscellaneous (control)	Total
Johnny Cake Shale, Kimberley, Western Australia	0	0	0	0	0	0	0	0	0	1	0	0	0	0	0	0	0	0	0	0	0	1	0	0	1		Red font: >581 Ma
Nadaleen Formation, NW Canada	0	0	0	0	0	0	0	0	0	0	4	0	0	0	0	1	0	0	0	4	0	0	0	1	5
Conception and St. John’s Groups, Newfoundland	0	1	0	0	0	0	0	0	0	1	7	1	0	0	0	0	0	0	0	8	0	1	0	1	10
Lantian Formation, South China	4	0	0	0	0	0	0	0	0	2	0	0	0	0	0	3	4	0	0	0	0	2	0	3	9
Stáhpogieddi Formation, Finnmark	0	0	0	0	0	0	0	0	0	1	0	0	0	0	3	0	0	0	0	0	0	1	3	0	4

## Sheet: Maps - 570-561 Ma
	Morphogroups																Type
Locality	Algal	Arboreomorpha	Bilateralomorpha	Cnidarian	Dickinsoniomorpha	Complex discoidal	Erniettomorpha	Kimberellamorpha	Pentaradialomorpha	Protist	Rangeomorpha	Sponges	Tetraradialomorpha	Triradialomorpha	Tubular	Miscellaneous	Algal	Bilateral	Radial	Frondomorph	Erniettomorph	Protist	Tubular	Miscellaneous (control)	Total
Wonoka Formation, South Australia	0	0	0	0	0	0	0	0	0	1	0	0	0	0	0	0	0	0	0	0	0	1	0	0	1
Conception and St. John’s Groups, Newfoundland	0	2	0	1	0	0	0	0	0	2	14	1	0	1	0	3	0	0	1	17	0	2	0	4	24
Itajaí Basin, Brazil	0	0	0	0	0	0	0	0	0	1	0	0	0	0	0	0	0	0	0	0	0	1	0	0	1
Maplewell Group, Charnwood, UK	0	2	0	0	0	0	0	0	0	1	4	0	0	0	0	1	0	0	0	6	0	1	0	1	8

## Sheet: Maps - 560-551 Ma
	Morphogroups																Type
Locality	Algal	Arboreomorpha	Bilateralomorpha	Cnidarian	Dickinsoniomorpha	Complex discoidal	Erniettomorpha	Kimberellamorpha	Pentaradialomorpha	Protist	Rangeomorpha	Sponges	Tetraradialomorpha	Triradialomorpha	Tubular	Miscellaneous	Algal	Bilateral	Radial	Frondomorph	Erniettomorph	Protist	Tubular	Miscellaneous (control)	Total
White Sea, Russia	4	4	11	3	5	1	2	2	0	3	3	2	1	4	3	14	4	18	6	7	2	3	3	19	62
Asha Group, South Urals	0	0	0	0	0	1	0	0	0	2	0	0	0	0	0	1	0	0	1	0	0	2	0	1	4
Chernokamen Formation, Central Urals	2	0	0	0	1	0	0	0	0	1	0	0	0	0	0	0	2	1	0	0	0	1	0	0	4
Ediacara Member, South Australia	4	4	6	0	3	1	2	1	1	0	4	3	1	2	4	9	4	10	6	8	2	0	4	11	45
Arumbera Sandstone, Northern Territory	0	0	0	0	0	1	0	0	0	0	0	0	0	1	0	0	0	0	2	0	0	0	0	0	2
Moldova and Ukraine	0	2	0	0	2	0	1	1	0	1	1	0	1	1	1	7	0	3	2	3	1	1	1	7	18
Blueflower Formation, NW Canada	0	0	0	0	1	0	0	0	0	0	0	0	0	0	0	0	0	1	0	0	0	0	0	0	1
Miette Group, British Columbia	1	0	0	0	0	0	0	0	0	0	2	0	0	0	0	0	1	0	0	2	0	0	0	0	3
Conception and St. John’s Groups, Newfoundland	1	0	0	0	0	0	0	0	0	0	0	0	0	0	0	0	1	0	0	0	0	0	0	0	1
Miaohe Member, Yangtze Gorges, South China	12	0	0	0	0	1	0	0	0	2	0	0	0	0	4	2	12	0	1	0	0	2	4	2	21
Bhima Group, Karnataka	0	1	0	0	0	0	0	0	0	0	0	0	0	0	0	0	0	0	0	1	0	0	0	0	1
Maplewell Group, Charnwood, UK	0	2	0	0	0	0	0	0	0	1	4	0	0	0	0	1	0	0	0	6	0	1	0	1	8
Stáhpogieddi Formation, Finnmark	0	0	0	0	0	0	0	0	0	0	0	0	0	0	0	1	0	0	0	0	0	0	0	1	1

## Sheet: Maps - 550-539 Ma
	Morphogroups																Type
Locality	Algal	Arboreomorpha	Bilateralomorpha	Cnidarian	Dickinsoniomorpha	Complex discoidal	Erniettomorpha	Kimberellamorpha	Pentaradialomorpha	Protist	Rangeomorpha	Sponges	Tetraradialomorpha	Triradialomorpha	Tubular	Miscellaneous	Algal	Bilateral	Radial	Frondomorph	Erniettomorph	Protist	Tubular	Miscellaneous (control)	Total
Yudoma Group, Siberia	1	0	1	0	0	1	0	0	0	1	0	0	0	0	2	1	1	1	1	0	0	1	2	1	7
Khatyspyt Formation, Olenek Uplift, Siberia	2	2	0	0	0	0	0	0	0	1	1	0	0	0	4	1	2	0	0	3	0	1	4	1	11
Blueflower Formation, NW Canada	1	0	0	0	0	0	1	0	0	0	0	0	0	1	2	1	1	0	1	0	1	0	2	1	6
Miette Group, British Columbia	0	0	1	0	0	0	0	0	0	0	0	0	0	0	1	0	0	1	0	0	0	0	1	0	2
Conception and St. John’s Groups, Newfoundland	0	0	0	0	0	0	0	0	0	1	0	0	0	0	0	0	0	0	0	0	0	1	0	0	1
Johnnie Formation, Wood Canyon Formation, Stirling Quartzite and Deep Spring Formation, California and Nevada, West USA	1	0	0	0	0	0	1	0	0	0	0	0	0	0	6	0	1	0	0	0	1	0	6	0	8
The Kushk Series, Iran	0	0	0	0	0	2	0	1	0	0	0	0	0	1	3	1	0	1	3	0	0	0	3	1	8
Dengying Formation, Yangtze Gorges, South China	1	1	1	0	1	0	1	0	0	1	3	0	0	0	2	1	1	2	0	4	1	1	2	1	12
Shaanxi Province, South China	0	0	0	0	0	0	0	0	0	0	0	0	0	0	6	0	0	0	0	0	0	0	6	0	6
Nama Group, Namibia	1	0	1	1	0	1	4	0	0	1	1	0	0	0	3	5	1	1	1	1	4	1	3	6	18
Vindhyan and Marwar Supergroups, and Krol and Tal Groups, Uttar Pradesh Region	1	0	0	0	0	0	0	1	0	0	0	0	1	0	1	1	1	1	1	0	0	0	1	1	5
Corumbá Group, SW Brazil/Paraguay	2	0	1	1	0	0	0	0	0	0	0	0	0	0	2	0	2	1	0	0	0	0	2	1	6
Ibor Group, Spain	1	0	0	0	0	0	0	0	0	0	0	0	0	0	5	1	1	0	0	0	0	0	5	1	7
Albemarle Group, North Carolina	0	0	0	0	0	0	3	0	0	0	0	0	0	0	2	0	0	0	0	0	3	0	2	0	5
Zuun-Arts Formation, Mongolia	2	0	0	0	0	0	0	0	0	0	0	0	0	0	1	0	2	0	0	0	0	0	1	0	3
Ara Group, Oman	0	0	1	0	0	0	0	0	0	0	0	0	0	0	1	0	0	1	0	0	0	0	1	0	2
Stáhpogieddi Formation, Finnmark	0	0	0	0	0	0	0	0	0	1	0	0	0	0	0	1	0	0	0	0	0	1	0	1	2

## Sheet: Maps - Bilateral&Biomineraliser
	Bilateral Map					Biomineraliser Map
Locality	Bilateralomorpha	Dickinsoniomorpha	Kimberellamorpha	Bilateral Total	Traces	Complex discoidal	Bilateralomorpha1	Tubular	All tubes + mineralisers	Biomineralisers Total
White Sea, Russia	11	5	2	18	1	0	0	0	6	0
Asha Group, South Urals	0	0	0	0	1	0	0	0	0	0
Chernokamen Formation, Central Urals	0	1	0	1	0	0	0	0	0	0
Yudoma Group, Siberia	1	0	0	1	0	1	1	1	6	3
Khatyspyt Formation, Olenek Uplift, Siberia	0	0	0	0	0	0	0	2	8	2
Ediacara Member, South Australia	6	3	1	10	1	0	0	0	8	0
Wonoka Formation, South Australia	0	0	0	0	0	0	0	0	0	0
Johnny Cake Shale, Kimberley, Western Australia	0	0	0	0	0	0	0	0	0	0
Arumbera Sandstone, Northern Territory	0	0	0	0	0	0	0	0	0	0
Moldova and Ukraine	0	2	1	3	1	0	0	0	2	0
Blueflower Formation, NW Canada	0	1	0	1	1	0	0	0	4	0
Nadaleen Formation, NW Canada	0	0	0	0	0	0	0	0	0	0
Miette Group, British Columbia	1	0	0	1	1	0	1	1	3	2
Conception and St. John’s Groups, Newfoundland	0	0	0	0	0	0	0	0	0	0
Johnnie Formation, Wood Canyon Formation, Stirling Quartzite and Deep Spring Formation, California and Nevada, West USA	0	0	0	0	1	0	0	1	12	1
The Kushk Series, Iran	0	0	1	1	0	0	0	1	6	1
Lantian Formation, South China	0	0	0	0	0	0	0	0	0	0
Miaohe Member, Yangtze Gorges, South China	0	0	0	0	1	0	0	0	8	0
Dengying Formation, Yangtze Gorges, South China	1	1	0	0	1	0	0	1	4	1
Shaanxi Province, South China	0	0	0	0	1	0	0	3	12	3
Nama Group, Namibia	1	0	0	1	1	1	1	1	8	3
Vindhyan and Marwar Supergroups, and Krol and Tal Groups, Uttar Pradesh Region	0	0	1	1	0	0	0	0	2	0
Bhima Group, Karnataka	0	0	0	0	0	0	0	0	0	0
Corumbá Group, SW Brazil/Paraguay	1	0	0	1	1	0	1	1	5	2
Itajaí Basin, Brazil	0	0	0	0	0	0	0	0	0	0
Ibor Group, Spain	0	0	0	0	0	0	0	2	10	2
Maplewell Group, Charnwood, UK	0	0	0	0	0	0	0	0	0	0
Albemarle Group, North Carolina	0	0	0	0	0	0	0	0	4	0
Zuun-Arts Formation, Mongolia	0	0	0	0	0	0	0	0	2	0
Ara Group, Oman	1	0	0	1	0	0	1	1	3	2
Stáhpogieddi Formation, Finnmark	0	0	0	0	0	0	0	3	6	3		Note - Finnmark biomineralisers are Si biomineralising

[truncated: 1 more sheets: Coordinates]
